# Supplementary material for: Methicillin-Resistant Staphylococcus aureus from Peninsular Malaysian Animal Handlers: Molecular Profile, Antimicrobial Resistance, Immune Evasion Cluster and Genotypic Categorization
Source: MDPI journal article supplement (doi:10.3390/antibiotics11010103), 2022-01-14
Supplement: s1 [file s1]

**Table S1:** Demographic data and molecular profile of MDRSA isolates (n=30).

| ID | State        | Location ID | Origin         | Animals               | <i>S. aureus</i> strain | AMR genes                       | Virulence genes    | IEC type | <i>Spa</i> type |
|----|--------------|-------------|----------------|-----------------------|-------------------------|---------------------------------|--------------------|----------|-----------------|
| 1  | Kelantan     | 1           | Animal farmer  | Ruminant              | MDR-MSSA                | <i>ermA-msrA</i>                | <i>sak</i>         | N        | t095            |
| 2  | Terengganu   | 2           | Animal farmer  | Poultry               | MDR-MSSA                | <i>tetK-ermC</i>                | <i>scn-sak</i>     | E        | t4171           |
| 3  | Terengganu   | 2           | Animal farmer  | Poultry               | MDR-MSSA                | <i>ermC</i>                     | -                  | N        | t4171           |
| 4  | Pahang       | 3           | Animal farmers | Ruminant              | MDR-MSSA                | <i>tetK</i>                     | <i>scn</i>         | H        | t189            |
| 5  | Kuala Lumpur | 4           | Pet owner      | Cats and dogs         | MDR-MSSA                | <i>ermC</i>                     | <i>scn-sak</i>     | B        | t050            |
| 6  | Kelantan     | 5           | Veterinarian   | Pet and livestock     | MDR-MSSA                | <i>tetK-ermC</i>                | -                  | NT       | t9531           |
| 7  | Kuala Lumpur | 6           | Veterinarian   | Cats and dogs         | MDR-MSSA                | <i>tetL-ermC</i>                | -                  | NT       | t084            |
| 8  | Johor        | 7           | Animal farmers | Poultry               | MDR-MSSA                | <i>tetL-ermA-ermB-ermC-msrA</i> | <i>sak</i>         | N        | t605            |
| 9  | Pahang       | 8           | Animal farmers | Poultry               | MDR-MSSA                | <i>msrA</i>                     | -                  | NT       | t4171           |
| 10 | Pahang       | 8           | Animal farmers | Poultry               | MDR-MSSA                | <i>msrA</i>                     | -                  | NT       | t189            |
| 11 | Pahang       | 8           | Animal farmers | Poultry               | MDR-MRSA                | <i>mecA-tetK-tetM-msrA</i>      | -                  | NT       | t189            |
| 12 | Pahang       | 8           | Animal farmers | Poultry               | MDR-MSSA                | <i>tetK-ermA-ermB-ermC-msrA</i> | -                  | NT       | t189            |
| 13 | Terengganu   | 9           | Animal farmers | Poultry               | MDR-MSSA                | <i>msrA</i>                     | -                  | NT       | t2174           |
| 14 | Terengganu   | 9           | Animal farmers | Poultry               | MDR-MSSA                | <i>tetL</i>                     | -                  | NT       | t2174           |
| 15 | Terengganu   | 9           | Animal farmers | Poultry               | MDR-MSSA                | <i>tetK</i>                     | -                  | NT       | t2174           |
| 16 | Terengganu   | 9           | Animal farmers | Poultry               | MDR-MSSA                | <i>tetL</i>                     | -                  | NT       | t127            |
| 17 | Terengganu   | 9           | Animal farmers | Poultry               | MDR-MSSA                | -                               | <i>sak</i>         | N        | t2174           |
| 18 | Terengganu   | 10          | Animal farmers | Ruminants             | MDR-MSSA                | <i>ermA-msrA</i>                | <i>sak</i>         | N        | t050            |
| 19 | Perak        | 11          | Animal farmers | Aquaculture           | MDR-MSSA                | -                               | <i>sak</i>         | N        | t315            |
| 20 | Penang       | 12          | Animal farmers | Ruminant and poultry  | MDR-MSSA                | -                               | -                  | NT       | t189            |
| 21 | Terengganu   | 13          | Pet owner      | Pet                   | MDR-MSSA                | -                               | <i>scn-sak</i>     | E        | t4171           |
| 22 | Selangor     | 14          | Pet owner      | Pet                   | MDR-MSSA                | <i>tetK</i>                     | <i>scn-sak-chp</i> | B        | t550            |
| 23 | Kelantan     | 15          | Animal farmers | Ruminants             | MDR-MSSA                | -                               | -                  | NT       | t548            |
| 24 | Kelantan     | 16          | Animal farmers | Ruminants             | MDR-MSSA                | -                               | -                  | NT       | t091            |
| 25 | Terengganu   | 17          | Animal farmers | Ruminants             | MDR-MSSA                | <i>tetK</i>                     | -                  | NT       | t714            |
| 26 | Terengganu   | 18          | Animal farmers | Ruminants             | MDR-MSSA                | <i>tetK-ermC-msrA</i>           | -                  | NT       | t3937           |
| 27 | Terengganu   | 19          | Animal farmers | Ruminants and poultry | MRSA                    | <i>mecA</i>                     | <i>scn-sak</i>     | E        | t4171           |
| 28 | Terengganu   | 20          | Pet owners     | Pet                   | MRSA                    | <i>mecA-tetK</i>                | <i>scn-sak</i>     | E        | t3293           |
| 29 | Terengganu   | 20          | Pet owners     | Pet                   | MRSA                    | <i>mecA-tetK</i>                | <i>scn-sak</i>     | E        | t3293           |
| 30 | Kelantan     | 16          | Animal farmer  | Ruminants             | MRSA                    | <i>mecA</i>                     | -                  | NT       | t3080           |

N= No type; NT= Non-typable
